# Supplementary material for: Severe thiamine deficiency in eastern Baltic cod (Gadus morhua)
Source: PLoS One. 2020 Jan 2;15(1):e0227201. doi: 10.1371/journal.pone.0227201 (PMC6939936; doi:10.1371/journal.pone.0227201)
Supplement: S1 Table — (XLSX) [file pone.0227201.s001.xlsx]

## Sheet: Sheet1
Specimen	Sex	Batch	Average otholit weight [mg]	Captivity time [h]	Total weight [g]	Somatic weight [g]	Length [cm]	Gonad [g]	Liver [g]	Brain [g]	SCI	LSI [%]	Liver T [nmol/g]	Liver TMP [nmol/g]	Liver TDP [nmol/g]	Liver SumT [nmol/g]	Proportion liver T [%]	Proportion liver TMP [%]	Proportion liver TDP [%]	Liver TK end [nmol/min mg]	Liver TK max [nmol/min mg]	Liver latency [%]	Brain TK end [nmol/min mg]	Brain TK max [nmol/min mg]	Brain TK latency [%]	Age	Age quality
1	F	Batch 1	229.002	1	560	549.92	39.6	10.08	13.46	0.58	0.885552	2.44763	0.298566	1.99207	6.83275	9.12339	3.27253	21.8348	74.8927	13.5121	26.5597	49.1255	.	.	.	3	2
2	U	Batch 1	124.705	3	380	379.01	34.8	0.99	7.2	0.5	0.899317	1.89969	0.45426	4.49427	12.4148	17.3634	2.6162	25.8837	71.5001	31.4824	37.8265	16.7716	.	.	.	2	1
3	F	Batch 1	194.928	4	570	559.85	42.2	10.15	10.85	0.68	0.744962	1.93802	0.305759	2.56282	8.67801	11.5466	2.64805	22.1955	75.1565	14.0838	15.9097	11.4768	.	.	.	3	1
4	U	Batch 1	134.485	5	570	570	40.8	0	12.19	0.39	0.839256	2.1386	0.645364	2.73886	8.43171	11.8159	5.46181	23.1794	71.3588	22.9111	29.2997	21.8041	.	.	.	2	2
5	F	Batch 1	262.23	21	345	335.77	37.7	9.23	5.39	0.58	0.62664	1.60527	0.457775	3.60021	12.565	16.623	2.75387	21.6581	75.5881	20.053	24.8031	19.1512	.	.	.	5	1
6	U	Batch 1	257.233	22	650	636.71	43.8	13.29	28.29	0.82	0.757738	4.44315	0.203373	1.00694	3.85913	5.06944	4.01174	19.863	76.1252	19.4172	22.1929	12.5075	.	.	.	3	2
7	F	Batch 1	239.317	26	255	248.43	34.8	6.57	11.73	0.63	0.589476	4.72165	0.194373	1.47723	5.20433	6.87594	2.82686	21.4841	75.689	21.4979	25.3823	15.3035	.	.	.	3	3
8	F	Batch 1	251.167	27	415	409.92	39.5	5.08	9.33	0.78	0.665132	2.27605	0.257355	1.51385	7.25135	9.02256	2.85235	16.7785	80.3691	21.1153	25.5898	17.4856	.	.	.	4	2
9	M	Batch 1	277.445	28	495	492.34	42	2.66	17.8	0.81	0.664534	3.61539	0.245503	1.35277	5.92214	7.52042	3.26449	17.988	78.7475	27.1505	28.2561	3.91282	.	.	.	3	3
10	U	Batch 1	.	29	575	566.38	40.8	8.62	32.38	0.76	0.833926	5.71701	0.303717	0.964181	5.30299	6.57089	4.62216	14.6735	80.7043	31.4801	33.079	4.83355	.	.	.	.	.
11	M	Batch 1	175.213	32	280	273.22	33.7	6.78	5.88	0.47	0.713876	2.15211	0.649968	4.56563	16.45	21.6656	3	21.0732	75.9268	17.3195	16.8173	-2.9863	.	.	.	3	1
12	F	Batch 1	236.998	33	470	459.1	38.8	10.9	15.75	0.64	0.785981	3.43063	0.317271	1.74499	6.06286	8.12512	3.90482	21.4765	74.6187	40.2905	41.1606	2.11403	.	.	.	3	1
13	F	Batch 1	121.18	34	395	392.51	34.9	2.49	8.86	0.49	0.923367	2.25727	0.56011	2.81583	9.63389	13.0098	4.30528	21.6438	74.0509	21.3573	27.0362	21.0049	.	.	.	1	2
14	M	Batch 1	239.18	45	475	473.69	37.2	1.31	21.04	0.78	0.920164	4.44172	0.167038	2.02116	6.98775	9.17595	1.82039	22.0267	76.1529	21.4277	27.2901	21.4817	.	.	.	4	2
15	M	Batch 1	347.71	47	600	600	43.7	0	27.25	1.02	0.718964	4.54167	0.523664	2.07983	7.69687	10.3004	5.08393	20.1918	74.7242	17.3796	19.384	10.3404	.	.	.	6	2
16	M	Batch 1	262.483	48	415	410.8	39.3	4.2	14.89	0.86	0.676788	3.62463	0.525149	1.83561	8.81673	11.1775	4.69828	16.4224	78.8793	18.772	20.1567	6.86957	.	.	.	6	3
17	F	Batch 1	147.748	69	410	406.39	35.7	3.61	9.98	0.57	0.893179	2.45577	0.524781	2.48785	10.9718	13.9845	3.75261	17.7901	78.4573	31.4986	34.8229	9.54628	.	.	.	2	2
18	M	Batch 1	247.357	70	545	543.23	38.5	1.77	23.56	0.79	0.951922	4.33702	0.147568	1.39426	7.02727	8.5691	1.72209	16.2708	82.0071	19.5968	23.2611	15.753	.	.	.	4	2
19	F	Batch 1	222.282	74	290	284.89	35	5.11	3.46	0.65	0.664466	1.2145	0.988091	3.2971	17.4008	21.686	4.55635	15.2038	80.2398	.	.	.	6.53146	8.59969	24.05	3	2
20	M	Batch 1	158.245	80	260	258.63	33.4	1.37	2.97	0.56	0.694128	1.14836	0.798722	4.26318	18.9397	24.0016	3.32779	17.7621	78.9101	.	.	.	8.56836	12.2699	30.1677	2	2
21	F	Batch 1	64.9525	81	110	109.62	23.1	0.38	1.8	0.31	0.889311	1.64204	0.227932	2.52797	13.4169	16.1728	1.40935	15.631	82.9596	.	.	.	5.29649	9.60814	44.875	1	1
22	M	Batch 2	250.985	1	430	421.46	36.4	8.54	19.17	0.66	0.873881	4.54847	.	.	.	.	.	.	.	15.9513	16.3707	2.56165	.	.	.	3	2
23	F	Batch 2	210.56	2	410	402.31	36.3	7.69	19.15	0.62	0.841087	4.76001	.	.	.	.	.	.	.	22.4359	24.1972	7.27903	.	.	.	3	1
24	M	Batch 2	167.64	3	405	403.01	37.5	1.99	20.78	0.65	0.764226	5.1562	.	.	.	.	.	.	.	26.3612	26.9155	2.05945	.	.	.	4	2
25	M	Batch 2	250.705	4	395	394.07	36.8	0.93	11.49	0.78	0.790733	2.91573	.	.	.	.	.	.	.	.	.	.	6.79827	10.901	37.6364	4	1
26	F	Batch 2	188.835	5	355	347.29	38	7.71	12.57	0.67	0.632909	3.61945	0.68504	2.13416	8.25736	11.0766	6.18459	19.2674	74.548	.	.	.	8.00423	8.10475	1.24031	4	3
27	F	Batch 2	201.165	5.5	340	334.23	34.7	5.77	21.48	0.63	0.799939	6.42671	0.114619	0.792779	3.36692	4.27432	2.68156	18.5475	78.7709	.	.	.	6.21976	10.1787	38.8941	3	1
28	F	Batch 2	311.255	6.5	485	470.88	43	14.12	7.51	0.81	0.59225	1.59489	0.351004	2.92675	12.982	16.2597	2.15873	18	79.8413	.	.	.	8.94164	9.00039	0.652773	6	3
29	M	Batch 2	137.58	7	420	404.59	36.7	15.41	25.67	0.53	0.818497	6.34469	0.0740898	0.656224	2.96359	3.6939	2.00573	17.765	80.2292	.	.	.	7.30924	6.77011	-7.96333	2	2
30	M	Batch 2	130.65	8	355	354.49	35	0.51	11.11	0.6	0.826799	3.13408	0.259979	1.55987	7.17235	8.9922	2.89116	17.3469	79.7619	.	.	.	9.72666	11.2786	13.76	3	2
31	M	Batch 2	240.69	9	400	394.19	33.6	5.81	11.8	0.76	1.03917	2.99348	.	.	.	.	.	.	.	.	.	.	5.25951	10.1374	48.1176	3	2
32	F	Batch 2	206.33	22	510	502.54	40.8	7.46	21.55	0.64	0.739929	4.28822	0.0532028	0.739519	3.66567	4.4584	1.19332	16.5871	82.2196	.	.	.	7.79556	10.65	26.8025	3	2
33	F	Batch 2	128.255	23	295	290.98	34.7	4.02	14.5	0.5	0.696426	4.98316	0.27027	1.29938	5.43139	7.00104	3.86043	18.5598	77.5798	.	.	.	9.52057	10.0358	5.13418	3	2
34	F	Batch 2	222.695	24	305	298.37	34.8	6.63	12.2	0.73	0.707974	4.08888	0.1132	1.11724	4.84792	6.07835	1.86235	18.3806	79.7571	.	.	.	6.78919	9.40958	27.8481	4	2
35	F	Batch 2	98.495	26.5	200	198.67	29.8	1.33	3.03	0.44	0.75073	1.52514	0.765358	4.46626	17.5579	22.7895	3.35837	19.5979	77.0437	.	.	.	6.52723	9.27766	29.6457	1	1
36	M	Batch 2	213.155	27.5	400	398.87	36	1.13	10.02	0.6	0.854917	2.5121	0.282871	2.44631	10.4295	13.1587	2.14968	18.5908	79.2596	.	.	.	8.54343	8.46964	-0.871323	2	2
37	F	Batch 3	398.725	1	1530	1507.24	56.5	22.76	103.82	1.2	0.835674	6.88809	.	.	.	.	.	.	.	18.3331	28.7745	36.2871	.	.	.	6	2
38	F	Batch 3	384.605	2	1090	1070.35	54	19.65	50.17	0.86	0.679743	4.68725	0.163855	0.607229	3.77831	4.5494	3.60169	13.3475	83.0508	26.6299	29.5832	9.98315	.	.	.	5	2
39	F	Batch 3	358.175	3	1145	1127.66	49.5	17.34	64.21	0.96	0.929742	5.69409	0.115031	0.393021	2.71281	3.22086	3.57143	12.2024	84.2262	27.0125	30.9316	12.6703	.	.	.	6	2
40	F	Batch 3	317.725	24	970	960.26	49.3	9.74	58.47	0.84	0.801398	6.08898	0.0400882	0.290639	2.06454	2.39527	1.67364	12.1339	86.1925	14.1985	18.4511	23.0481	.	.	.	5	2
41	F	Batch 3	323.625	25	790	770.5	43.9	19.5	27.58	1.06	0.910708	3.57949	0.10237	0.767774	5.43584	6.30598	1.62338	12.1753	86.2013	22.7078	25.6351	11.4192	.	.	.	6	2
42	F	Batch 3	309.3	26	670	666.37	43.3	3.63	43.81	0.87	0.820827	6.57443	0.0998552	0.329522	1.93719	2.36657	4.21941	13.9241	81.8565	14.8893	20.1804	26.2192	.	.	.	5	2
43	F	Batch 3	288.26	27	820	804.11	44.8	15.89	29.21	0.68	0.894296	3.63259	0.134436	0.889349	6.52534	7.54912	1.78082	11.7808	86.4384	20.8378	25.4598	18.1541	.	.	.	4	2
44	F	Batch 3	148.25	27.5	315	310.15	31.6	4.85	7.07	0.61	0.982903	2.27954	0.290416	1.25847	9.46757	11.0165	2.6362	11.4236	85.9402	25.9777	27.4248	5.27634	.	.	.	2	1
45	M	Batch 3	245.725	28.5	530	527.28	42	2.72	13.39	0.91	0.711694	2.53945	.	.	.	.	.	.	.	.			7.71893	9.29414	16.9485	6	2
46	F	Batch 3	296.25	29	750	736.21	42.9	13.79		0.99	0.932459	.	.	.	.	.	.	.	.	.			5.82706	10.3874	43.9024	6	2
47	M	Batch 3	280.395	30	725	723.83	44	1.17	35.93	0.86	0.849725	4.96387	.	.	.	.	.	.	.	.			7.22109	10.0942	28.4631	4	2
48	M	Batch 3	195.92	31	485	482.69	39.3	2.31	28.13	0.88	0.795226	5.82776	.	.	.	.	.	.	.	.			7.48091	11.7617	36.3959	5	2
49	M	Batch 3	361.93	44	895	893.64	49.9	1.36	43.15	0.99	0.719219	4.82857	.	.	.	.	.	.	.	10.3726	19.1096	46.0915	3.79657	11.3118	66.4371	6	2
50	F	Batch 3	264.01	47.5	405	399.6	37.9	5.4	9.46	0.77	0.73402	2.36737	.	.	.	.	.	.	.	.			7.11796	10.0322	29.0487	5	2
51	F	Batch 3	259.76	48	495	482.51	40.3	12.49	22.59	0.87	0.73721	4.68177	.	.	.	.	.	.	.	.			5.01601	8.87248	43.4655	6	2
			Abbreviations
			F = Female
			M = Male
			U = Unidentifiable
			TK end = endogenous TK enzyme activity
			TK max = maximum TK enzyme activity
